# Supplementary material
Source: publisher figshare collection journal article supplement (https://f1000.figshare.com/ndownloader/files/225429)
Supplement: Supplementary file 1 [file 225429]

Skill item number	Skills	1	2	3	4	Valid	Missing	Mean	Median	Mode	Std. Deviation	Range	Minimum	Maximum
item1rpa	Measuring body temperature	1	11	21	48	82	0	3.439	4.000	4.0	.7714	3.0	1.0	4.0
item2rpa	Measuring Respiratory Rate	2	15	31	34	82	0	3.183	3.000	4.0	.8184	3.0	1.0	4.0
item3rpa	Recording Pulse	1	4	38	39	82	0	3.378	3.000	3.0a	.6600	3.0	1.0	4.0
item4rpa	Measuring Blood Pressure	2	15	33	32	82	0	3.171	3.000	4.0	.8135	3.0	1.0	4.0
item5rpa	Detecting Pedal Edema	2	21	29	30	82	0	3.061	3.000	4.0	.8513	3.0	1.0	4.0
item6rpa	Detecting Cyanosis	2	15	44	21	82	0	3.024	3.000	3.0	.7366	3.0	1.0	4.0
item7rpa	Detecting Clubbing	4	15	36	27	82	0	3.049	3.000	3.0	.8448	3.0	1.0	4.0
item8rpa	Palpating cervical Lymph Nodes	6	40	23	13	82	0	2.524	2.000	2.0	.8495	3.0	1.0	4.0
item9rpa	Demonstrating range of motion at elbow Joint	12	39	20	11	82	0	2.390	2.000	2.0	.9130	3.0	1.0	4.0
item10rpa	Demonstrating range of motion at Hip Joint	12	37	20	13	82	0	2.415	2.000	2.0	.9290	3.0	1.0	4.0
item11rpa	Palpating Peripheral Pulses	6	39	18	19	82	0	2.634	2.000	2.0	.9364	3.0	1.0	4.0
item12rpa	Assess expansion of the chest	9	31	27	15	82	0	2.585	3.000	2.0	.9156	3.0	1.0	4.0
item13rpa	Determining Position of Trachea or palpation for Trachea	12	35	20	15	82	0	2.463	2.000	2.0	.9583	3.0	1.0	4.0
item14rpa	Percussion of Anterior Chest	9	25	29	19	82	0	2.707	3.000	3.0	.9492	3.0	1.0	4.0
item15rpa	Auscultation of Posterior Chest	13	38	22	9	82	0	2.329	2.000	2.0	.8757	3.0	1.0	4.0
item16rpa	Eliciting Vocal Resonance on anterior chest	19	32	20	11	82	0	2.280	2.000	2.0	.9721	3.0	1.0	4.0
item17rpa	Measuring Jugular Venous Pressure	33	32	12	5	82	0	1.841	2.000	1.0	.8815	3.0	1.0	4.0
item18rpa	Localizing of Apex Beat	8	36	27	11	82	0	2.524	2.000	2.0	.8639	3.0	1.0	4.0
item19rpa	Auscultation of Precordium	33	28	12	9	82	0	1.963	2.000	1.0	.9993	3.0	1.0	4.0
item20rpa	Use of otoscope in examining ear	19	34	19	8	82	0	2.244	2.000	2.0	.9501	3.0	1.0	4.0
item21rpa	Use of nasal speculum in examining ear	36	27	16	3	82	0	1.854	2.000	1.0	.9043	3.0	1.0	4.0
item22rpa	Use of head mirror with light in examining ear	20	45	11	6	82	0	2.049	2.000	2.0	.8448	3.0	1.0	4.0
item23rpa	Measurement of Visual Acuity	9	40	20	13	82	0	2.451	2.000	2.0	.8910	3.0	1.0	4.0
item24rpa	Measurement of Visual Fields by confrontation method	17	31	25	9	82	0	2.317	2.000	2.0	.9280	3.0	1.0	4.0
item25rpa	Examination of unioccular eye movement (Muscles)	20	36	15	11	82	0	2.207	2.000	2.0	.9653	3.0	1.0	4.0
item26rpa	Examination of Pupillary Light Reaction	4	29	32	17	82	0	2.756	3.000	3.0	.8398	3.0	1.0	4.0
item27rpa	Palpation of Liver	9	27	28	18	82	0	2.671	3.000	3.0	.9435	3.0	1.0	4.0
item28rpa	Palpation of Kidneys	9	26	30	17	82	0	2.671	3.000	3.0	.9304	3.0	1.0	4.0
item29rpa	Palpation of Spleen	10	26	28	18	82	0	2.659	3.000	3.0	.9586	3.0	1.0	4.0
item30rpa	Eliciting of Shifting Dullness	17	28	25	12	82	0	2.390	2.000	2.0	.9782	3.0	1.0	4.0
item31rpa	Measurement of Liver Span	36	27	11	8	82	0	1.890	2.000	1.0	.9814	3.0	1.0	4.0
item32rpa	Examination of Facial Nerve	18	37	18	9	82	0	2.220	2.000	2.0	.9166	3.0	1.0	4.0
item33rpa	Examination of Accessory nerve	27	31	17	7	82	0	2.049	2.000	2.0	.9415	3.0	1.0	4.0
item34rpa	Eliciting Tone of Muscles in Upper Limbs	18	41	15	8	82	0	2.159	2.000	2.0	.8815	3.0	1.0	4.0
item35rpa	Eliciting Reflexes in Lower Limbs	10	41	21	10	82	0	2.378	2.000	2.0	.8555	3.0	1.0	4.0
item36rpa	Eliciting Planter Response	16	31	28	7	82	0	2.317	2.000	2.0	.8872	3.0	1.0	4.0
item37rpa	Eliciting Position Sense in Lower Limbs	22	35	19	6	82	0	2.110	2.000	2.0	.8890	3.0	1.0	4.0
item38rpa	Assessing orientation to time, place and person	3	14	39	26	82	0	3.073	3.000	3.0	.7978	3.0	1.0	4.0
item39rpa	Measurement of Height in Children	1	16	38	27	82	0	3.110	3.000	3.0	.7537	3.0	1.0	4.0
item40rpa	Measurement of Mid arm Circumference in Children	2	19	35	26	82	0	3.037	3.000	3.0	.8081	3.0	1.0	4.0
item41rpa	Demonstration dehydration in infants	6	25	35	16	82	0	2.768	3.000	3.0	.8649	3.0	1.0	4.0
item42rpa	Counting Respiratory rate in children under five years of age	11	38	21	12	82	0	2.415	2.000	2.0	.9020	3.0	1.0	4.0
item43rpa	Demonstration of pallor in children	5	24	41	12	82	0	2.732	3.000	3.0	.7864	3.0	1.0	4.0
item44rpa	Demonstration of jaundice in children	5	24	40	13	82	0	2.744	3.000	3.0	.7983	3.0	1.0	4.0
item45rpa	Measurement of Height of Fundus	18	29	25	10	82	0	2.329	2.000	2.0	.9565	3.0	1.0	4.0
item46rpa	Eliciting obstetrical grips or Leopold’s maneuver	40	20	13	9	82	0	1.890	2.000	1.0	1.0424	3.0	1.0	4.0
sumafter						82	0	116.4512	116.0000	105.00a	23.20555	116.00	51.00	167.00
a. Multiple modes exist. The smallest value is shown
